# Supplementary material for: Insights into structure, morphology and conductivity of the earth-abundant NASICON phosphate, Na 4 MnFe(PO 4 ) 3
Source: Royal Society of Chemistry journal article supplement (doi:10.1039/d4ra03529a), 2024-01-01
Supplement: d4ra03529a1.pdf [file d4ra03529a1.pdf]

**Supporting information for**  
**Insights into Structure, Morphology and Conductivity of the**  
**Earth-Abundant NASICON Phosphate, Na<sub>4</sub>MnFe(PO<sub>4</sub>)<sub>3</sub>.**

Loubna Chayal<sup>a</sup>, Sirine El Arni<sup>a</sup>, Mohamed Saadi<sup>a</sup>, Abderrazzak Assani<sup>a</sup>, Lahcen Bih<sup>b</sup>, Jiwei Ma<sup>c</sup>, and Mohammed Hadouchi<sup>a,\*</sup>

*<sup>a</sup>Laboratoire de Chimie Appliquée des Matériaux, Centre des Sciences des Matériaux, Faculty of Science, Mohammed V University in Rabat, Avenue Ibn Battouta, BP 1014, Rabat, Morocco*

*<sup>b</sup>Laboratory of Sciences and Professions of the Engineer, Materials and Processes Department ENSAM-Meknes Marjane II, Moulay Ismail University, El Mansour, Meknes P.O. Box 15290, Morocco*

*<sup>c</sup>Shanghai Key Laboratory for R&D and Application of Metallic Functional Materials Institute of New Energy for Vehicles School of Materials Science and Engineering Tongji University Shanghai 201804, China*

\*Corresponding author : [m.hadouchi@um5r.ac.ma](mailto:m.hadouchi@um5r.ac.ma)

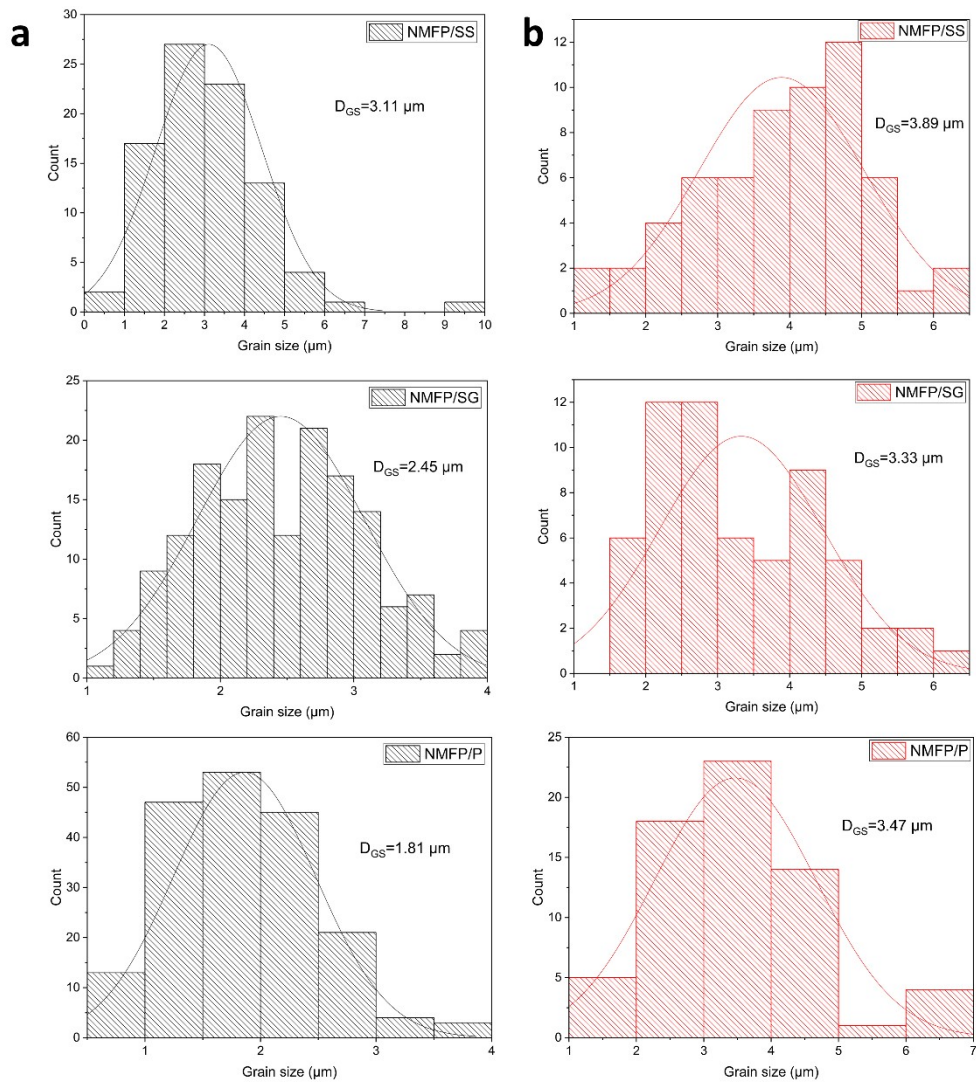

**Fig. S1.** Grain size distribution histograms **(a)** of the powders and **(b)** the pellets.

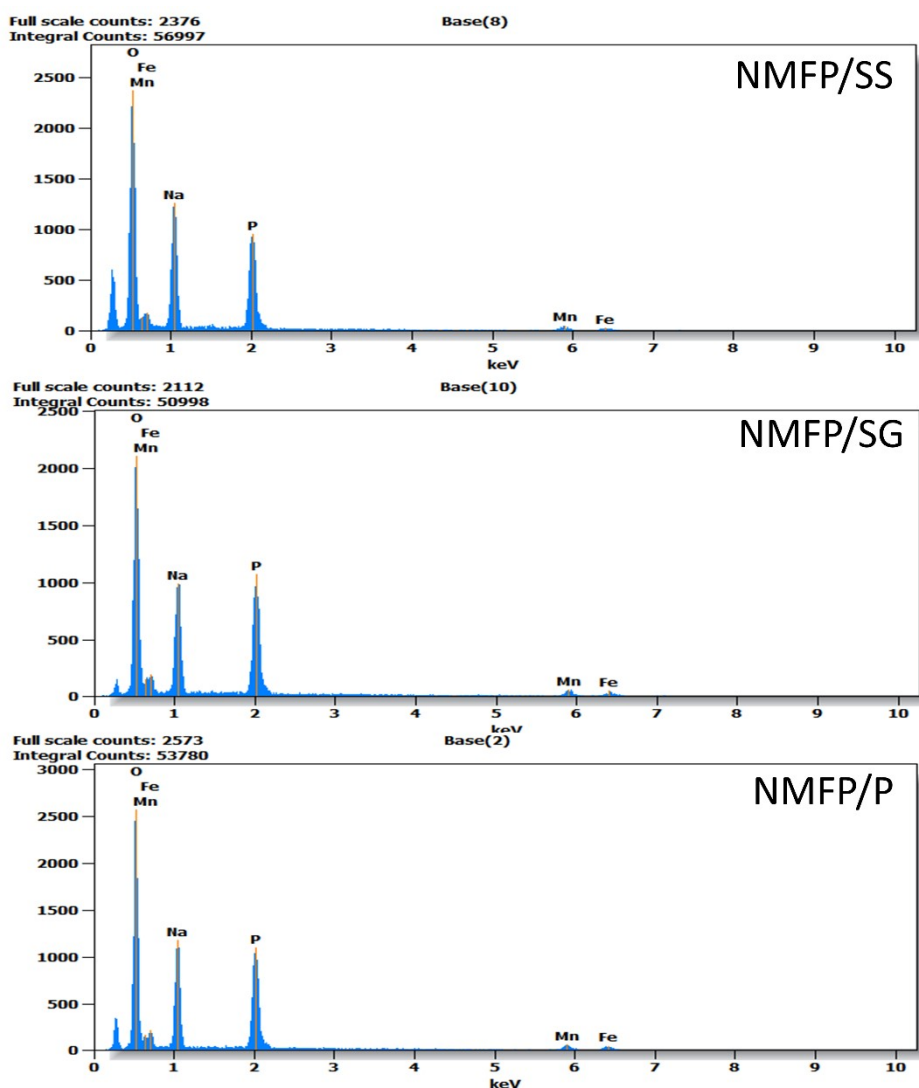

**Fig. S2.** EDS spectrum of the three powders.

**Table S1.** Geometric parameters ( $\text{\AA}$ ,  $^\circ$ ) of NMFP synthesized by different methods.

| Distances ( $\text{\AA}$ ) | Method    |           |           | Angles ( $^\circ$ )                   | Method    |           |           |
|----------------------------|-----------|-----------|-----------|---------------------------------------|-----------|-----------|-----------|
|                            | SS        | SG        | P         |                                       | SS        | SG        | P         |
| Na1—O2                     | 2.417 (4) | 2.429 (4) | 2.425 (4) | O1—Fe—O1 <sup>i</sup>                 | 101.2 (3) | 100.7 (3) | 100.9 (3) |
| Na1—O2 <sup>i</sup>        | 2.417 (5) | 2.429 (5) | 2.425 (5) | O1—Fe—O1 <sup>ii</sup>                | 101.2 (3) | 100.7 (3) | 100.9 (3) |
| Na1—O2 <sup>ii</sup>       | 2.417 (4) | 2.429 (4) | 2.425 (4) | O1—Fe—O2                              | 87.2 (3)  | 87.1 (3)  | 87.0 (3)  |
| Na1—O2 <sup>iii</sup>      | 2.417 (4) | 2.429 (4) | 2.425 (4) | O1—Fe—O2 <sup>i</sup>                 | 88.3 (3)  | 88.4 (3)  | 88.4 (3)  |
| Na1—O2 <sup>iv</sup>       | 2.417 (5) | 2.429 (5) | 2.425 (5) | O1—Fe—O2 <sup>ii</sup>                | 165.7 (3) | 166.6 (3) | 166.3 (3) |
| Na1—O2 <sup>v</sup>        | 2.417 (4) | 2.429 (4) | 2.425 (4) | O1 <sup>i</sup> —Fe—O1 <sup>ii</sup>  | 101.2 (4) | 100.7 (4) | 100.9 (4) |
| Na2—O1 <sup>i</sup>        | 2.569 (4) | 2.577 (4) | 2.573 (4) | O1 <sup>i</sup> —Fe—O2                | 165.7 (4) | 166.6 (4) | 166.3 (4) |
| Na2—O1 <sup>vii</sup>      | 2.969 (5) | 2.978 (5) | 2.986 (5) | O1 <sup>i</sup> —Fe—O2 <sup>ii</sup>  | 88.3 (3)  | 88.4 (3)  | 88.4 (3)  |
| Na2—O1 <sup>viii</sup>     | 2.970 (6) | 2.979 (6) | 2.987 (6) | O1 <sup>ii</sup> —Fe—O2               | 88.3 (3)  | 88.4 (3)  | 88.4 (3)  |
| Na2—O1 <sup>x</sup>        | 2.568 (3) | 2.576 (4) | 2.572 (4) | O1 <sup>ii</sup> —Fe—O2 <sup>ii</sup> | 87.2 (3)  | 87.1 (3)  | 87.0 (3)  |
| Na2—O2 <sup>i</sup>        | 2.496 (3) | 2.497 (3) | 2.502 (3) | O2—Fe—O2 <sup>i</sup>                 | 81.5 (3)  | 82.1 (3)  | 81.9 (3)  |

|                      |           |           |           |                                         |           |           |           |
|----------------------|-----------|-----------|-----------|-----------------------------------------|-----------|-----------|-----------|
| Na2—O2 <sup>ii</sup> | 2.497 (7) | 2.487 (6) | 2.487 (7) | O2—Fe—O2 <sup>ii</sup>                  | 81.5 (2)  | 82.1 (2)  | 81.9 (2)  |
| Na2—O2 <sup>x</sup>  | 2.497 (3) | 2.497 (3) | 2.502 (3) | O2 <sup>i</sup> —Fe—O2 <sup>ii</sup>    | 81.5 (3)  | 82.1 (3)  | 81.9 (3)  |
| Na2—O2 <sup>xi</sup> | 2.497 (6) | 2.487 (5) | 2.487 (6) | O1—Mn—O1 <sup>i</sup>                   | 101.2 (3) | 100.7 (3) | 100.9 (3) |
| Fe—O1                | 2.030 (3) | 2.042 (3) | 2.035 (3) | O1—Mn—O1 <sup>ii</sup>                  | 101.2 (3) | 100.7 (3) | 100.9 (3) |
| Fe—O1 <sup>i</sup>   | 2.030 (5) | 2.042 (5) | 2.035 (5) | O1—Mn—O2                                | 87.2 (3)  | 87.1 (3)  | 87.0 (3)  |
| Fe—O1 <sup>ii</sup>  | 2.030 (5) | 2.042 (5) | 2.035 (5) | O1—Mn—O2 <sup>i</sup>                   | 88.3 (3)  | 88.4 (3)  | 88.4 (3)  |
| Fe—O2                | 2.126 (4) | 2.107 (4) | 2.119 (4) | O1—Mn—O2 <sup>ii</sup>                  | 165.7 (3) | 166.6 (3) | 166.3 (3) |
| Fe—O2 <sup>i</sup>   | 2.126 (5) | 2.107 (5) | 2.119 (5) | O1 <sup>i</sup> —Mn—O1 <sup>ii</sup>    | 101.2 (4) | 100.7 (4) | 100.9 (4) |
| Fe—O2 <sup>ii</sup>  | 2.126 (4) | 2.107 (4) | 2.119 (4) | O1 <sup>i</sup> —Mn—O2                  | 165.7 (4) | 166.6 (4) | 166.3 (4) |
| Mn—O1                | 2.030 (3) | 2.042 (3) | 2.035 (3) | O1 <sup>i</sup> —Mn—O2 <sup>i</sup>     | 87.2 (3)  | 87.1 (3)  | 87.0 (3)  |
| Mn—O1 <sup>i</sup>   | 2.030 (5) | 2.042 (5) | 2.035 (5) | O1 <sup>i</sup> —Mn—O2 <sup>ii</sup>    | 88.3 (3)  | 88.4 (3)  | 88.4 (3)  |
| Mn—O1 <sup>ii</sup>  | 2.030 (5) | 2.042 (5) | 2.035 (5) | O1 <sup>ii</sup> —Mn—O2                 | 88.3 (3)  | 88.4 (3)  | 88.4 (3)  |
| Mn—O2                | 2.126 (4) | 2.107 (4) | 2.119 (4) | O1 <sup>ii</sup> —Mn—O2 <sup>i</sup>    | 165.7 (4) | 166.6 (4) | 166.3 (4) |
| Mn—O2 <sup>i</sup>   | 2.126 (5) | 2.107 (5) | 2.119 (5) | O1 <sup>ii</sup> —Mn—O2 <sup>ii</sup>   | 87.2 (3)  | 87.1 (3)  | 87.0 (3)  |
| Mn—O2 <sup>ii</sup>  | 2.126 (4) | 2.107 (4) | 2.119 (4) | O2—Mn—O2 <sup>i</sup>                   | 81.5 (3)  | 82.1 (3)  | 81.9 (3)  |
| P—O1 <sup>xii</sup>  | 1.516 (4) | 1.499 (4) | 1.509 (5) | O2—Mn—O2 <sup>ii</sup>                  | 81.5 (2)  | 82.1 (2)  | 81.9 (2)  |
| P—O1 <sup>xiii</sup> | 1.517 (4) | 1.500 (4) | 1.510 (4) | O2 <sup>i</sup> —Mn—O2 <sup>ii</sup>    | 81.5 (3)  | 82.1 (3)  | 81.9 (3)  |
| P—O2 <sup>ii</sup>   | 1.550 (4) | 1.557 (3) | 1.550 (4) | O1 <sup>xii</sup> —P—O1 <sup>xiii</sup> | 109.6 (4) | 109.9 (4) | 109.5 (4) |
| P—O2 <sup>xi</sup>   | 1.551 (5) | 1.558 (5) | 1.550 (5) | O1 <sup>xii</sup> —P—O2 <sup>ii</sup>   | 107.0 (4) | 107.9 (4) | 107.9 (4) |
|                      |           |           |           | O1 <sup>xii</sup> —P—O2 <sup>xi</sup>   | 112.2 (5) | 111.4 (5) | 111.6 (5) |
|                      |           |           |           | O1 <sup>xiii</sup> —P—O2 <sup>ii</sup>  | 112.2 (4) | 111.3 (4) | 111.5 (4) |
|                      |           |           |           | O1 <sup>xiii</sup> —P—O2 <sup>xi</sup>  | 106.9 (5) | 107.8 (5) | 107.8 (5) |
|                      |           |           |           | O2 <sup>ii</sup> —P—O2 <sup>xi</sup>    | 109.0 (4) | 108.5 (3) | 108.6 (4) |

**Symmetry codes:** (i)  $-y, x-y, z$ ; (ii)  $-x+y, -x, z$ ; (iii)  $-x, -y, -z$ ; (iv)  $y, -x+y, -z$ ; (v)  $x-y, x, -z$ ; (vi)  $-y-1/3, -x+1/3, z-1/6$ ; (vii)  $x-1/3, x-y+1/3, z-1/6$ ; (viii)  $-x-1/3, -y+1/3, -z+1/3$ ; (ix)  $y-1/3, -x+y+1/3, -z+1/3$ ; (x)  $y-2/3, x-1/3, -z+1/6$ ; (xi)  $x-y-2/3, -y-1/3, -z+1/6$ ; (xii)  $-x+y-1/3, y-2/3, z-1/6$ ; (xiii)  $x-y-1/3, x-2/3, -z+1/3$ .
